# Supplementary material for: Electron transfer reaction of porphyrin and porphycene complexes of Cu(ii) and Zn(ii) in acetonitrile
Source: Royal Society of Chemistry journal article supplement (doi:10.1039/b812575a), 2008-11-14
Supplement: b812575a.pdf [file b812575a.pdf]

## Supplementary Information

### **Electron Transfer Reaction of Porphyrin and Porphycene Complexes of Cu(II) and Zn(II) in Acetonitrile**

Kaori Aoki, Toshimitsu Goshima, Yohei Kozuka, Yukiko Kawamori, Noboru Ono,  
Yoshio Hisaeda, Hideo D. Takagi, and Masahiko Inamo\*

*Contribution from the Department of Chemistry, Aichi University of Education, Kariya  
448-8542, Japan, Faculty of Science, Ehime University, Matsuyama 790-8577, Japan,  
Department of Chemistry and Biochemistry, Graduate School of Engineering, Kyushu  
University, Fukuoka 819-0395, Japan, Research Centre for Materials Science, Nagoya  
University, Nagoya 464-8602, Japan*

\* To whom correspondence should be addressed. E-mail:  
minamo@aecc.aichi-edu.ac.jp

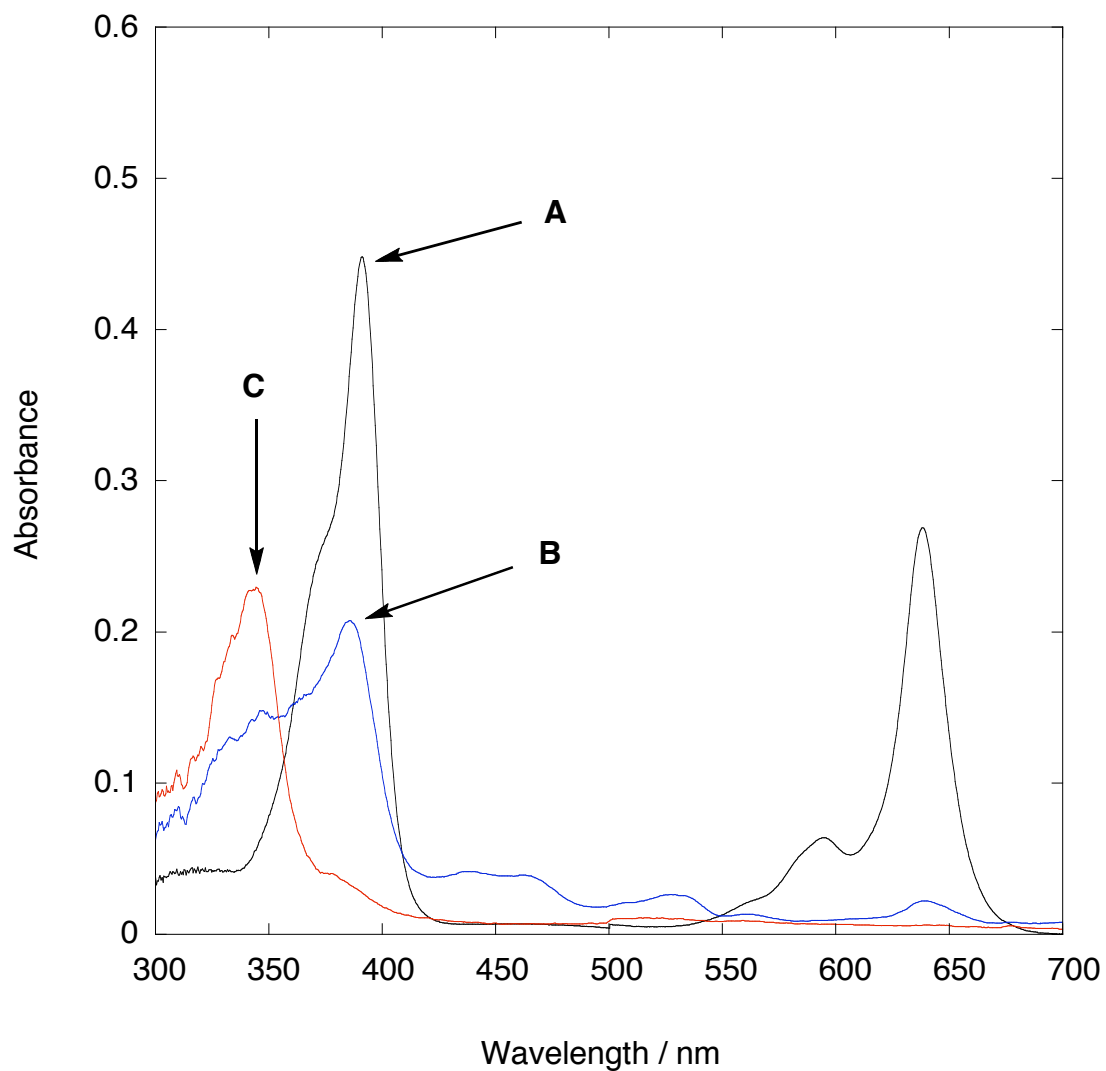

**Figure S1.** Change of the UV-visible absorption spectrum of [Zn(OEPc)] associated with the reaction with Cu(II) triflate in acetonitrile at  $T = 25.0^{\circ}\text{C}$ : [Zn(OEPc)] (**A**), [Zn(OEPc)]<sup>+</sup> (**B**), [Zn(OEPc)]<sup>2+</sup> (**C**).  $C_{\text{Zn-OEPc}} = 3.1 \times 10^{-6} \text{ M}$ ,  $C_{\text{Cu(II)}} = 2.55 \times 10^{-5} \text{ M}$ .

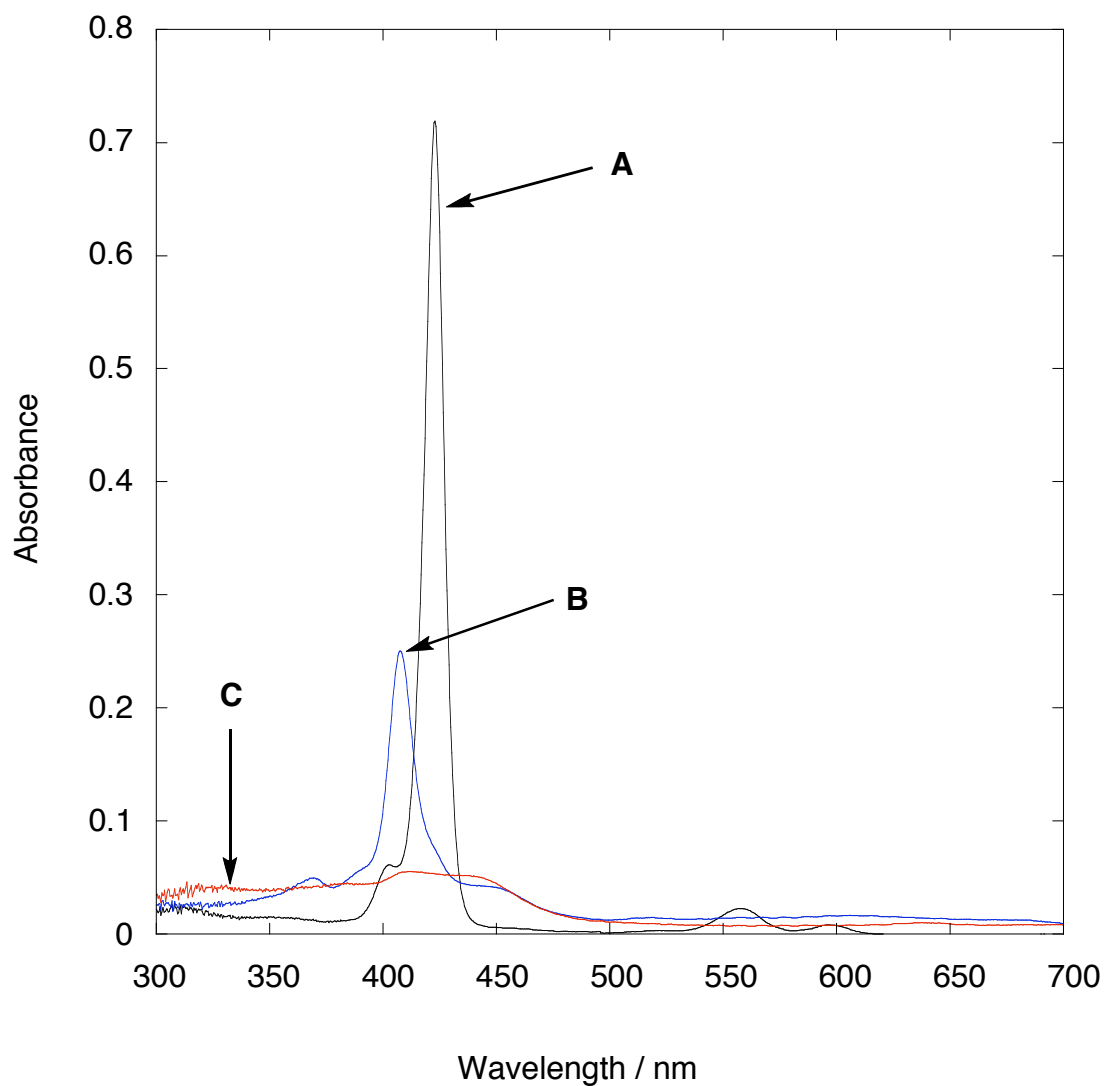

**Figure S2.** Change of the UV-visible absorption spectrum of [Zn(TPP)] associated with the reaction with Cu(II) triflate in acetonitrile at  $T = 25.0^\circ\text{C}$ : [Zn(TPP)] (**A**), [Zn(TPP)]<sup>+</sup> (**B**), [Zn(TPP)]<sup>2+</sup> (**C**).  $C_{\text{Zn-TPP}} = 1.2 \times 10^{-6} \text{ M}$ ,  $C_{\text{Cu(II)}} = 2.94 \times 10^{-5} \text{ M}$ .

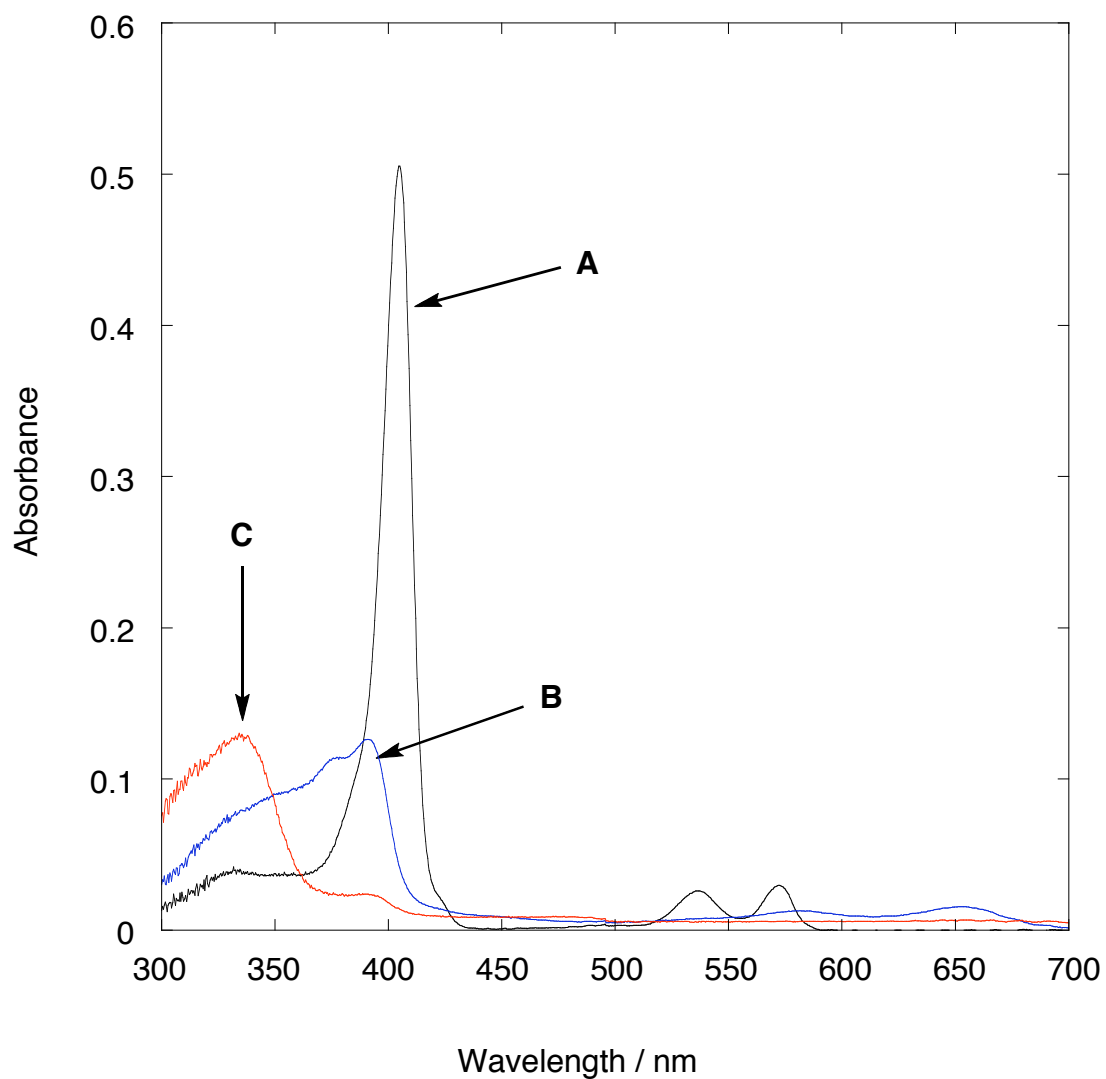

**Figure S3.** Change of the UV-visible absorption spectrum of [Zn(OEP)] associated with the reaction with Cu(II) triflate in acetonitrile at  $T = 25.0^\circ\text{C}$ : [Zn(OEP)] (**A**), [Zn(OEP)]<sup>+</sup> (**B**), [Zn(OEP)]<sup>2+</sup> (**C**).  $C_{\text{Zn-OEP}} = 1.7 \times 10^{-6} \text{ M}$ ,  $C_{\text{Cu(II)}} = 2.94 \times 10^{-5} \text{ M}$ .

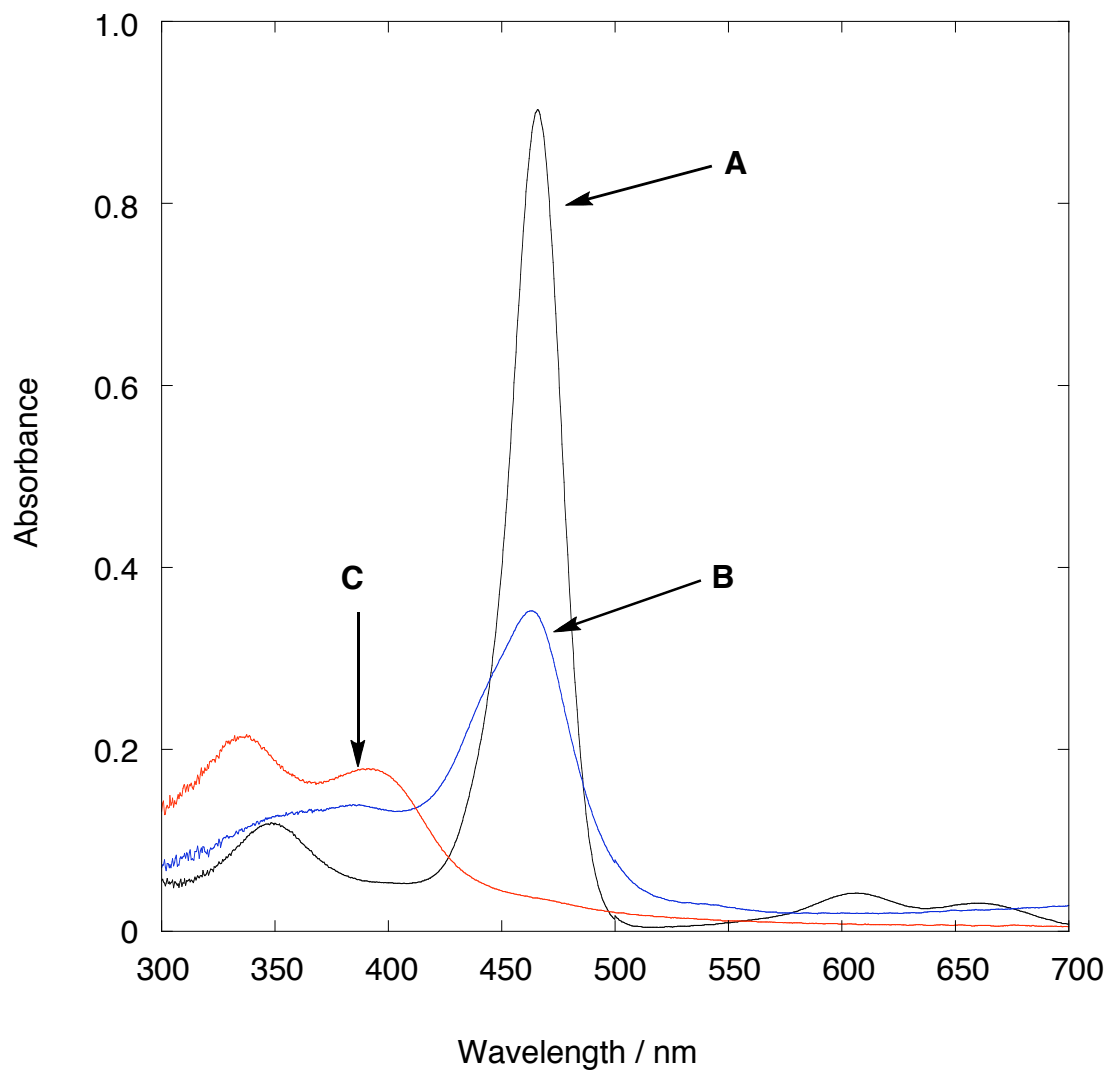

**Figure S4.** Change of the UV-visible absorption spectrum of [Zn(OETPP)] associated with the reaction with Cu(II) triflate in acetonitrile at  $T = 25.0^\circ\text{C}$ : [Zn(OETPP)] (**A**), [Zn(OETPP)]<sup>+</sup> (**B**), [Zn(OETPP)]<sup>2+</sup> (**C**).  $C_{\text{Zn-OETPP}} = 4.4 \times 10^{-6}$  M,  $C_{\text{Cu(II)}} = 2.94 \times 10^{-5}$  M.

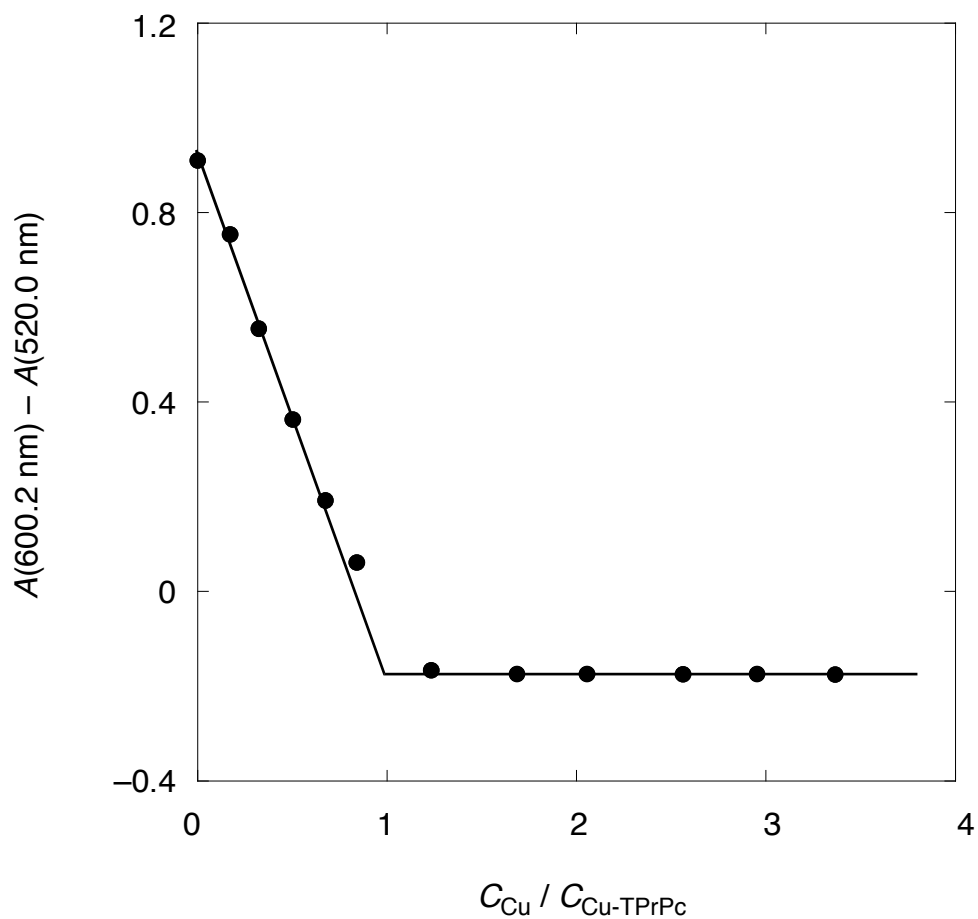

**Figure S5.** Dependence of the absorbance of the solution on the ratio of the total concentrations of Cu(II) ion ( $C_{\text{Cu}}$ ) and [Cu(TPrPc)] ( $C_{\text{Cu-TPrPc}}$ ) for the reaction of [Cu(TPrPc)] and Cu(II) triflate at  $T = 25.0$  °C. Total concentration of the porphycene complex is  $2.75 \times 10^{-5}$  M. The mixture of acetonitrile and dichloromethane (1:1 v/v) was used as a solvent instead of pure acetonitrile for the sake of higher solubility of the porphycene complex.
